# Supplementary material
Source: Springer Nature journal article supplement (https://www.springermedizin.de/resource/supplementary/12939_2009_163_MOESM7_ESM.pdf/9551620)

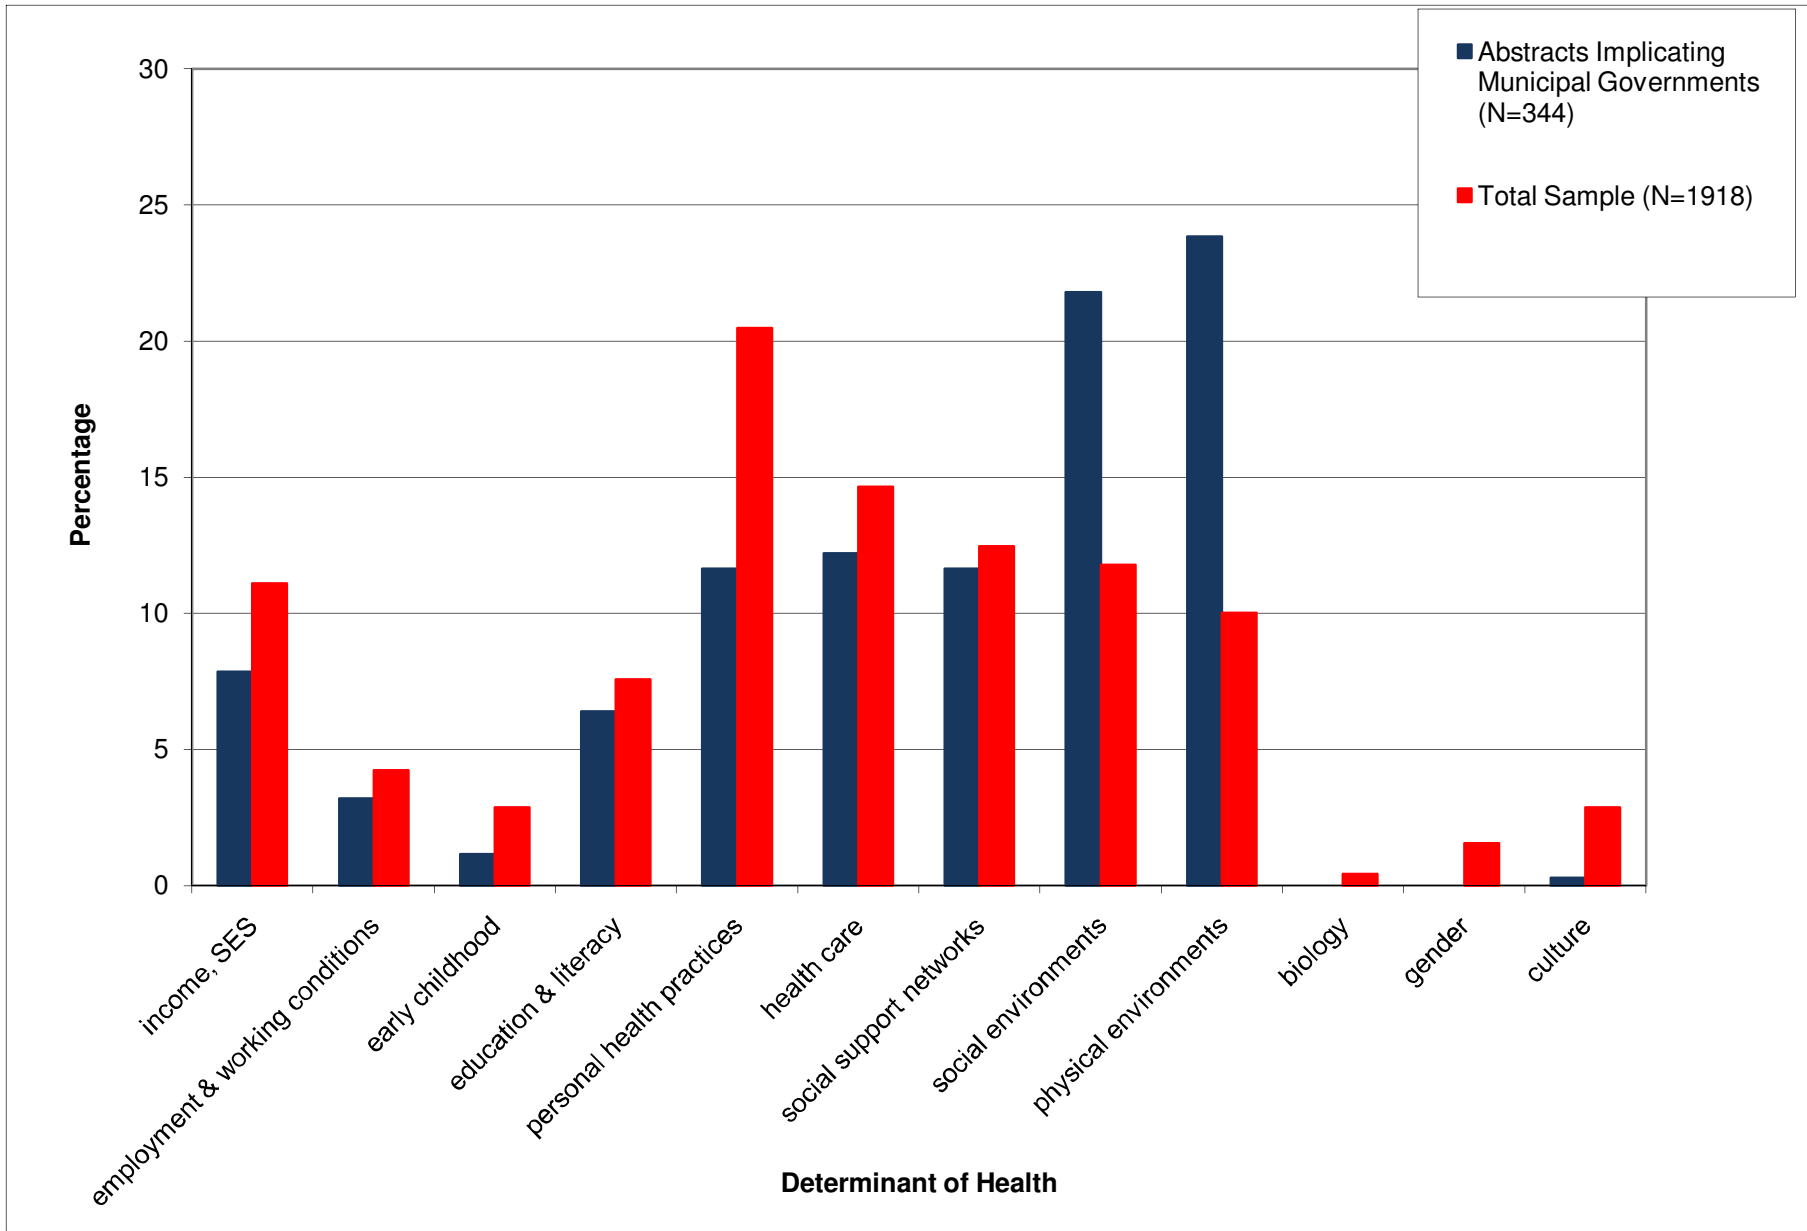

Supplement: MOESM7 [file 9551620]
